# Supplementary material
Source: PubMed Central journal article supplement (PMC3683390)
Supplement: NIHMS466262-supplement-1.pdf [file NIHMS466262-supplement-1.pdf]

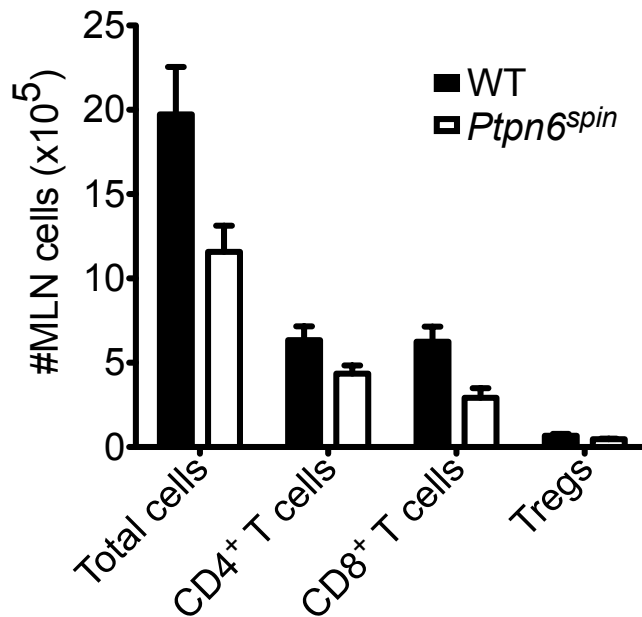

**Supplementary Figure 1. Mutation in PTPN6 does not affect the accumulation of cells in non-skin draining LNs.** Total numbers (mean  $\pm$  s.e.m.) of cells in the mesenteric LNs (MLNs) of 14-16 week old WT ( $n = 4$ ) and *Ptpn6<sup>spin</sup>* ( $n = 4$ ) mice that previously developed footpad disease. Data are representative of two independent experiments. Tregs refers to Foxp3 expressing CD4<sup>+</sup> T cells.

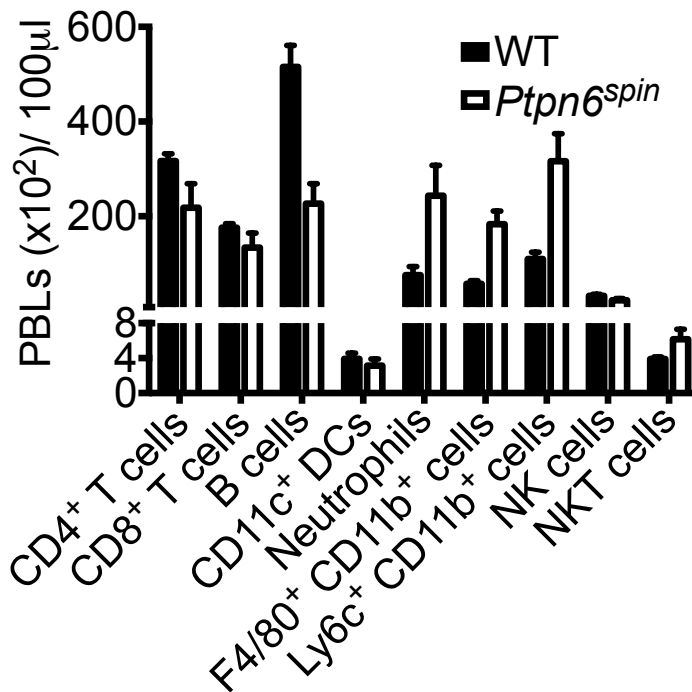

**Supplementary Figure 2. *Ptpn6*<sup>spin</sup> mutation results in enhanced numbers of circulating myeloid cells and neutrophils in the blood.** Total numbers (mean ± s.e.m.) of circulating immune cells in equal volumes of peripheral blood from 12-16 week old WT ( $n = 5$ ) and *Ptpn6*<sup>spin</sup> ( $n = 5$ ) mice that previously developed footpad disease. Data are representative of two independent experiments. PBL, peripheral blood leukocytes. DCs, dendritic cells. NK, natural killer.

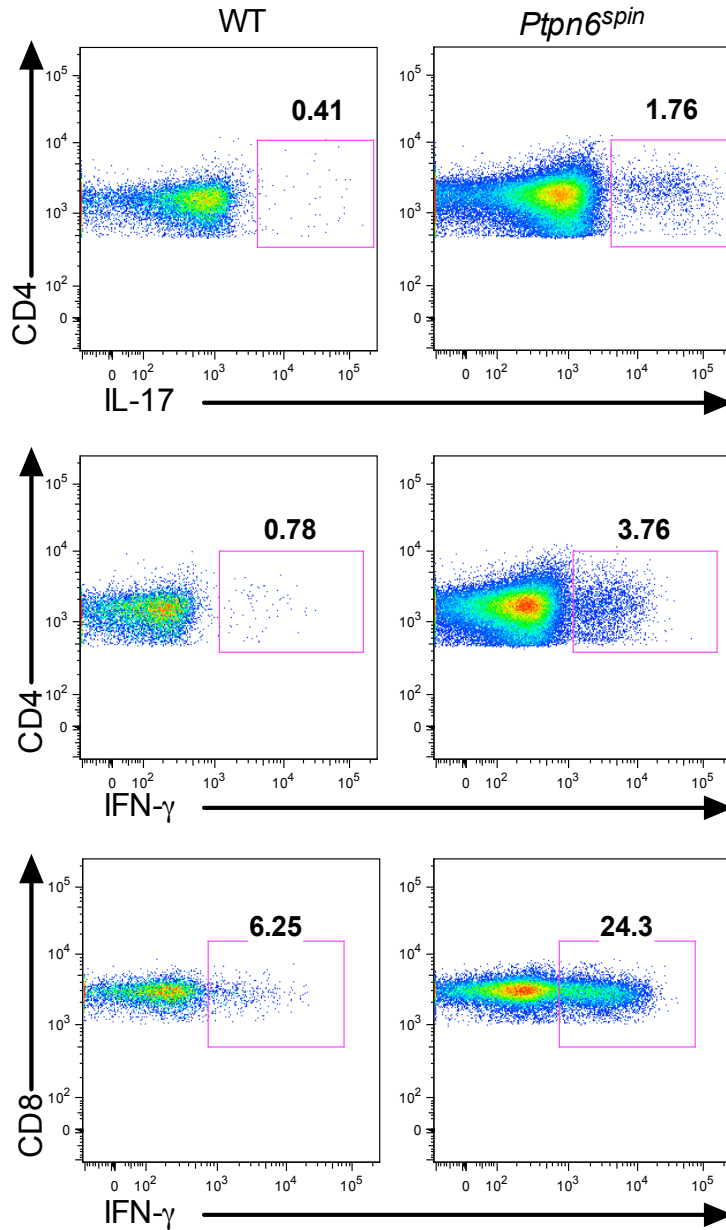

**Supplementary Figure 3. The inflammatory environment in *Ptpn6<sup>spin</sup>* mice promotes the generation of pathogenic T cells.** PopLNs were harvested from 10-12 week old WT and diseased *Ptpn6<sup>spin</sup>* mice and cells were restimulated with PMA/ionomycin followed by intracellular staining for IL-17 and IFN-γ. Representative FACS plots that correspond to the data presented in Figure 1f are shown. Data are representative of 5 independent experiments with at least 3-4 mice per group.

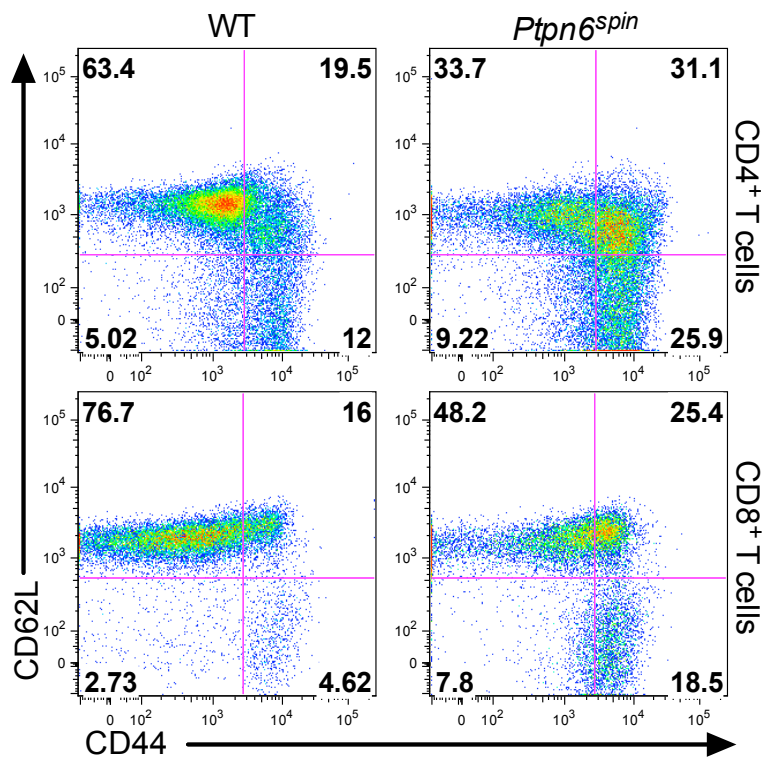

**Supplementary Figure 4. T cells exhibit an effector/memory phenotype in diseased *Ptpn6<sup>spin</sup>* mice.** Expression of CD44 and CD62L by CD4<sup>+</sup> and CD8<sup>+</sup> T cells from the popLNs of WT and diseased *Ptpn6<sup>spin</sup>* mice. Representative FACs plots from 5 independent experiments with at least 3-4 mice per group.

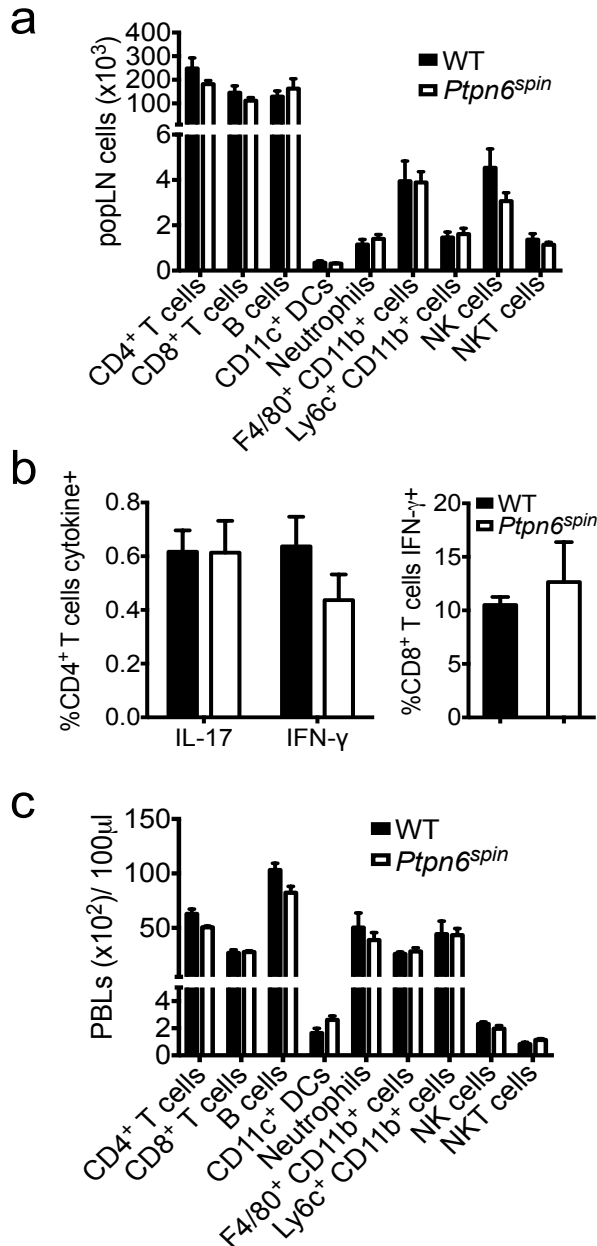

**Supplementary Figure 5. Young *Ptpn6<sup>spin</sup>* mice are characterized by normal numbers of immune cells.** **a-b**, Cells were harvested from WT and disease-free *Ptpn6<sup>spin</sup>* mice (4-8 weeks old). **a**, Numbers (mean  $\pm$  s.e.m.) of popLN cells and **b**, production of cytokines by CD4<sup>+</sup> (left panel) and CD8<sup>+</sup> T cells (right panel) following brief restimulation. **c**, Total numbers (mean  $\pm$  s.e.m.) of circulating immune cells in equal volumes of peripheral blood from 4-7 week old WT and *Ptpn6<sup>spin</sup>* mice. PBL, peripheral blood leukocytes. DCs, dendritic cells. NK, natural killer.

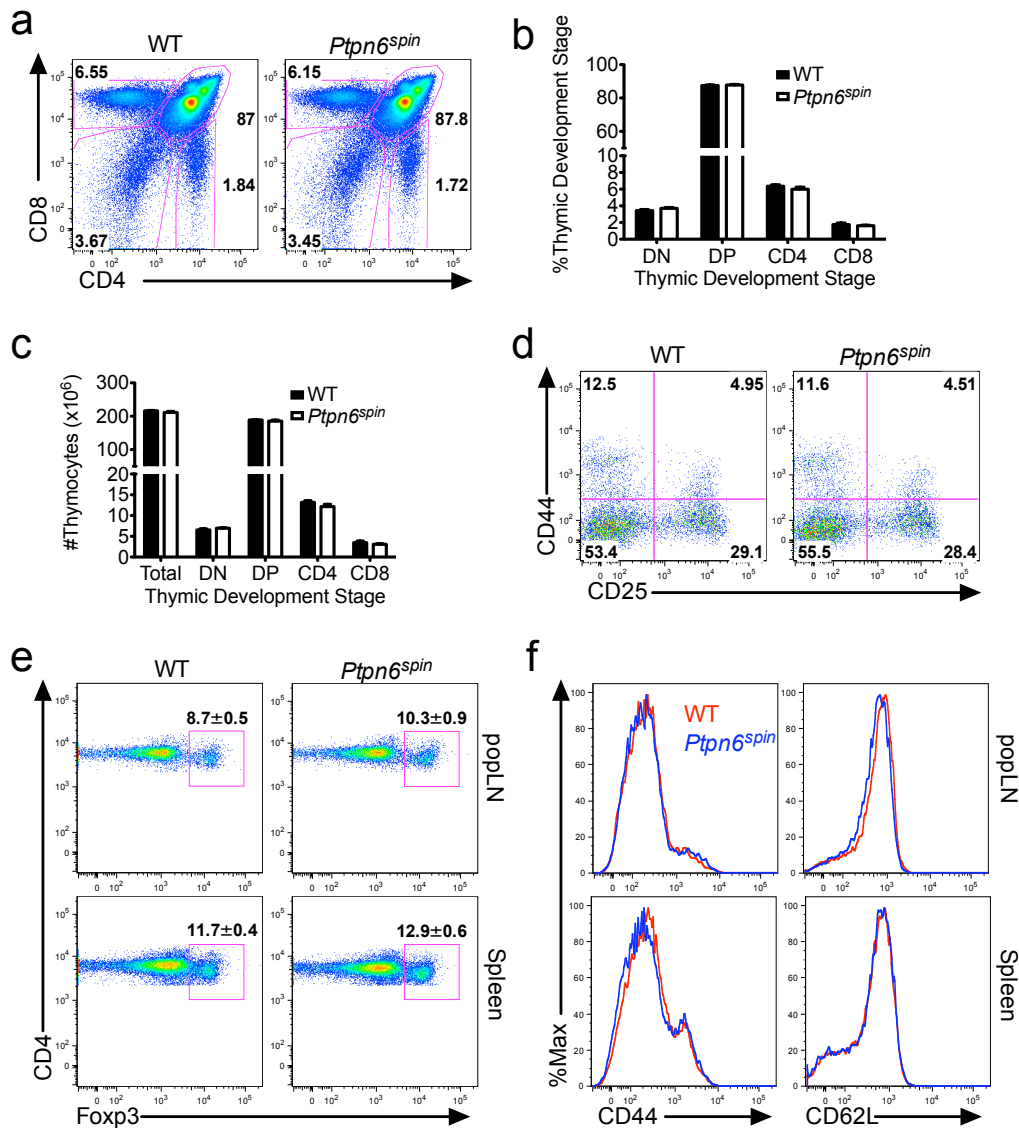

**Supplementary Figure 6. PTPN6 mutation does not influence T cell development or peripheral T cell activation status before the onset of footpad disease.** **a-d**, Thymic development was assessed in 4-7 week old WT and disease-free *Ptpn6<sup>spin</sup>* mice. Representative FACS plots (**a**) and combined data ( $n = 3-4$  mice per genotype) (**b**) of thymic development based on CD4 and CD8 staining. **c**, Total numbers (mean  $\pm$  s.e.m.) of thymocytes in each stage of thymic development ( $n = 3-4$  mice per genotype). DN, double negative (CD4<sup>-</sup> CD8<sup>-</sup>); DP, double positive (CD4<sup>+</sup> CD8<sup>+</sup>); CD4, CD4 single positive (CD4<sup>+</sup> CD8<sup>-</sup>); CD8, CD8 single positive (CD4<sup>-</sup> CD8<sup>+</sup>). **d**, Representative negative selection staining of double negative thymocytes. **e-f**, Analysis of the peripheral T cell compartment in 4-7 week old WT and disease-free *Ptpn6<sup>spin</sup>* mice ( $n = 3-4$  mice per genotype). **e**, Frequencies of CD4<sup>+</sup> T cells that express Foxp3 in the spleen and popliteal lymph nodes (popLN). **f**, Expression of CD44 and CD62L by CD4<sup>+</sup> T cells. All data are presented as mean  $\pm$  s.e.m. Data are representative of 3 independent experiments.

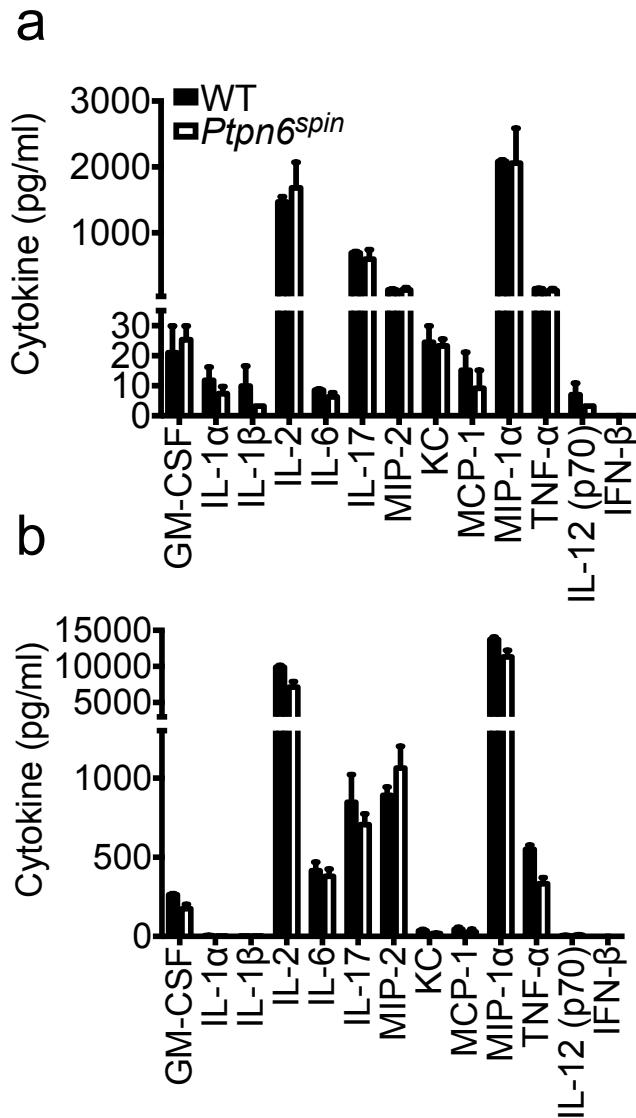

**Supplementary Figure 7. PMA/ionomycin-induced cytokine secretion is not augmented in disease-free *Ptpn6<sup>spin</sup>* mice.** a-b, Popliteal lymph node cells (a) and splenocytes (b) from WT and young *Ptpn6<sup>spin</sup>* mice ( $n = 3-4$  mice per genotype) were stimulated with PMA/ionomycin for 24 hrs and the secretion of cytokines was measured by ELISA.

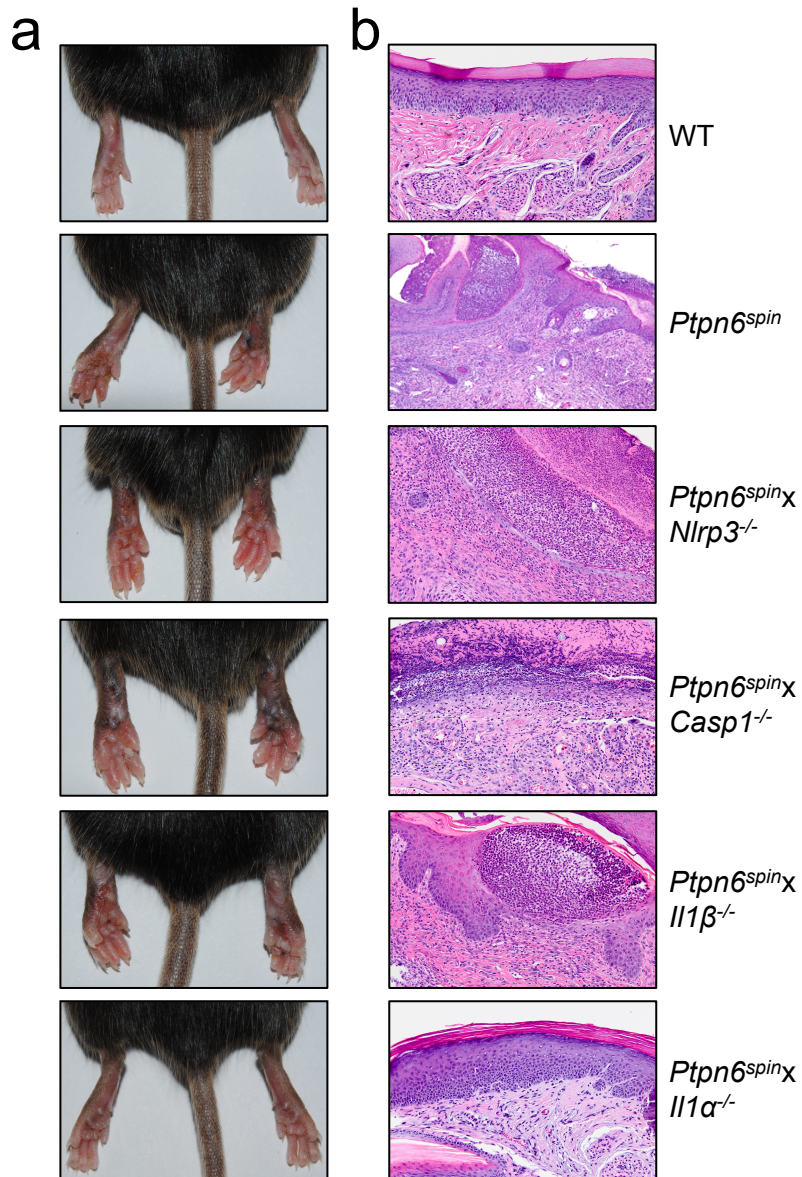

**Supplementary Figure 8. Deletion of IL-1 $\alpha$  abrogates cutaneous inflammatory disease in *Ptpn6<sup>spin</sup>* mice. a-b, Footpad images (a) and H&E sections (b) of WT and *Ptpn6<sup>spin</sup>* mice that were crossed with mice that are deficient in either NLRP3, Caspase-1, IL-1 $\beta$ , or IL-1 $\alpha$ . Representative images and sections are shown.**



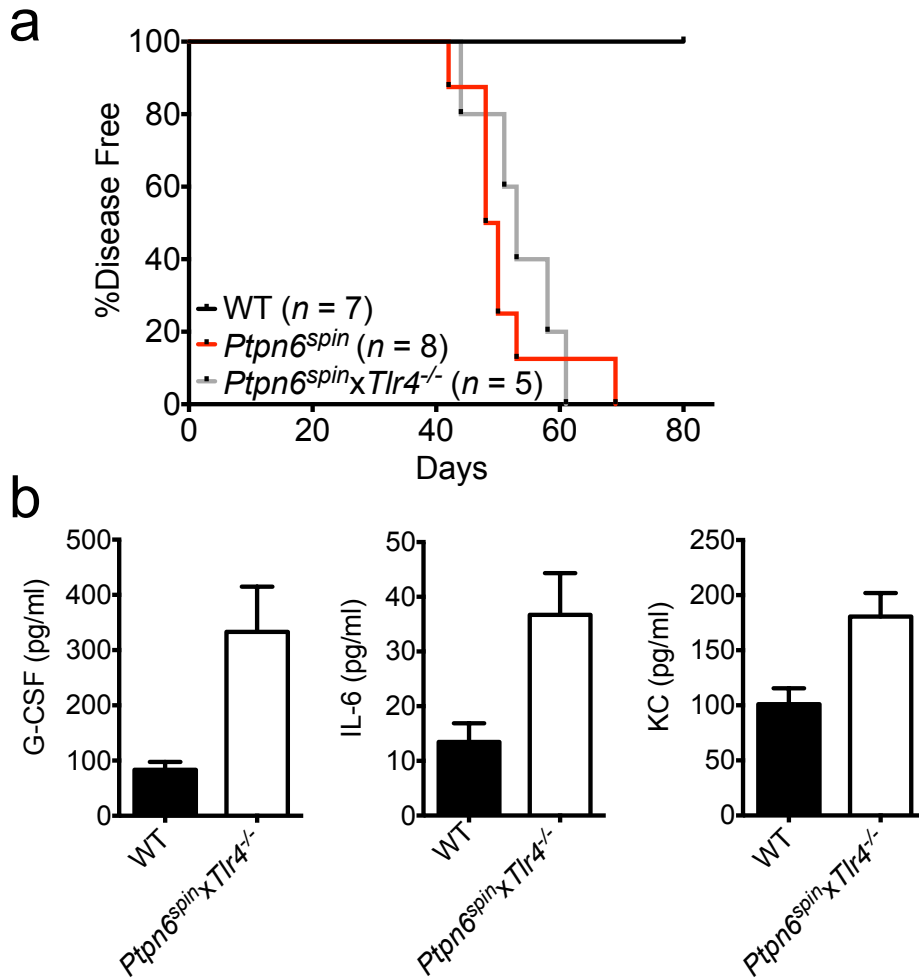

**Supplementary Figure 9. Deletion of TLR4 does not provide protection against *Ptpn6<sup>spin</sup>*-mediated disease.** **a**, Incidence of spontaneous inflammatory footpad disease in WT, *Ptpn6<sup>spin</sup>*, and *Ptpn6<sup>spin</sup> x Tlr4<sup>-/-</sup>* mice over time. **b**, Serum cytokine levels in WT and *Ptpn6<sup>spin</sup> x Tlr4<sup>-/-</sup>* mice at 10-14 weeks of age.

**a**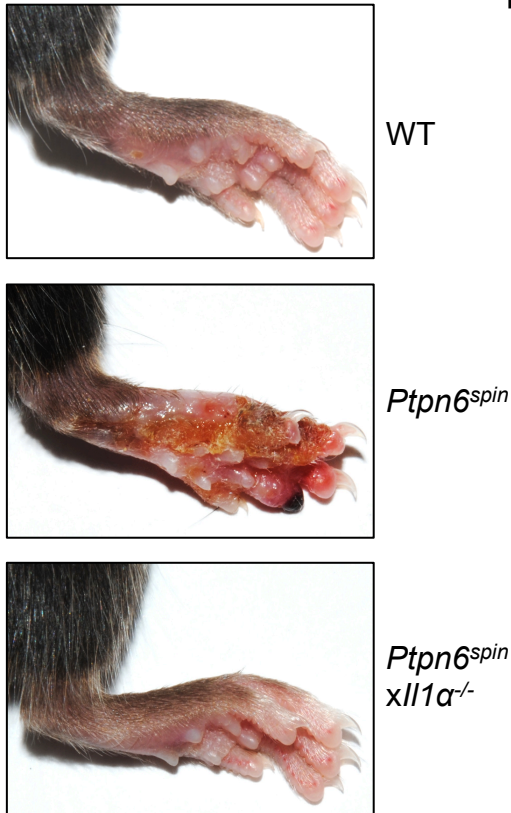**b**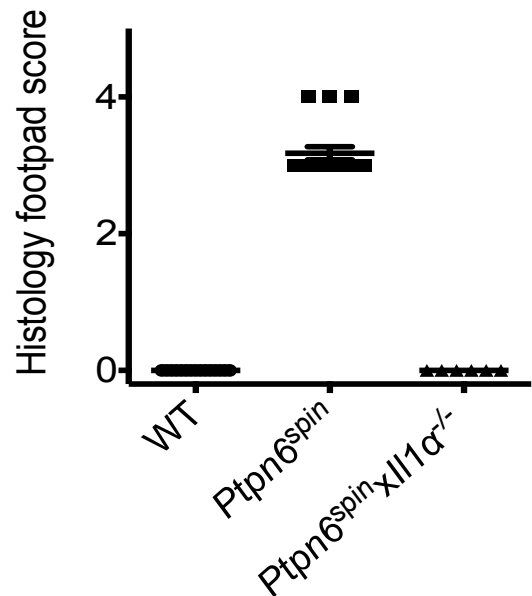

**Supplementary Figure 10. IL-1 $\alpha$  deficiency protects *Ptpn6<sup>spin</sup>* mice from footpad pathology.** **a**, Representative footpad images of microabrasion mice at 3-4 weeks post wound induction. **b**, Footpad H&E sections at 3-4 weeks post microabrasion wound induction were scored based on the extent and severity of inflammation, ulceration, and hyperplasia of the mucosa in a blinded fashion by a veterinary pathologist. Each point represents an individual mouse, and the line represents the mean  $\pm$  s.e.m. Data are combined from two independent experiments.

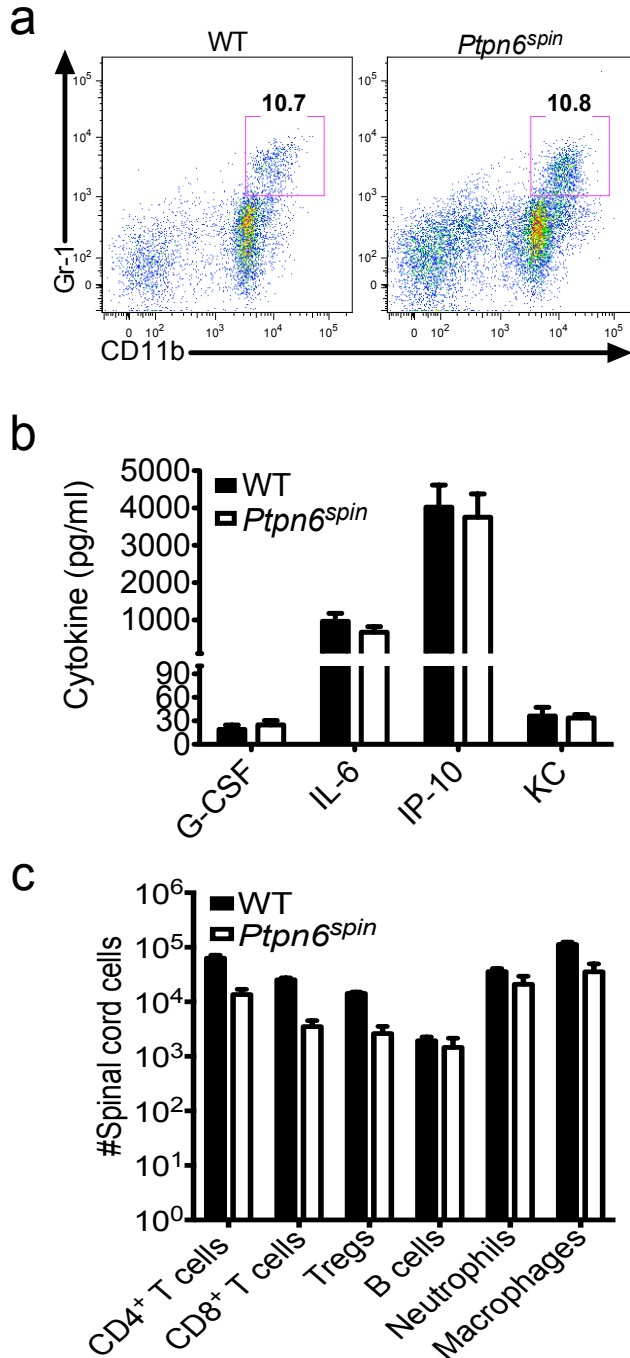

**Supplementary Figure 11. PTPN6 mutation does not influence neuroinflammation during EAE.** **a-c**, WT and disease-free (4-7 weeks of age) *Ptpn6<sup>spin</sup>* mice were immunized with MOG/CFA and leukocytes from the spinal cord were harvested on day 20. **a**, Frequencies of neutrophils (CD11b<sup>+</sup> Gr-1<sup>+</sup> cells) in the CD45<sup>+</sup> population. **b**, Spinal cord cells were stimulated for 48 hrs with MOG peptide and granulopoietic cytokines were measured by ELISA. **c**, Numbers (mean  $\pm$  s.e.m.) of cells in the spinal cord at day 20. Data are representative of two independent experiments with at least 3-4 mice per group. Data show mean  $\pm$  s.e.m.

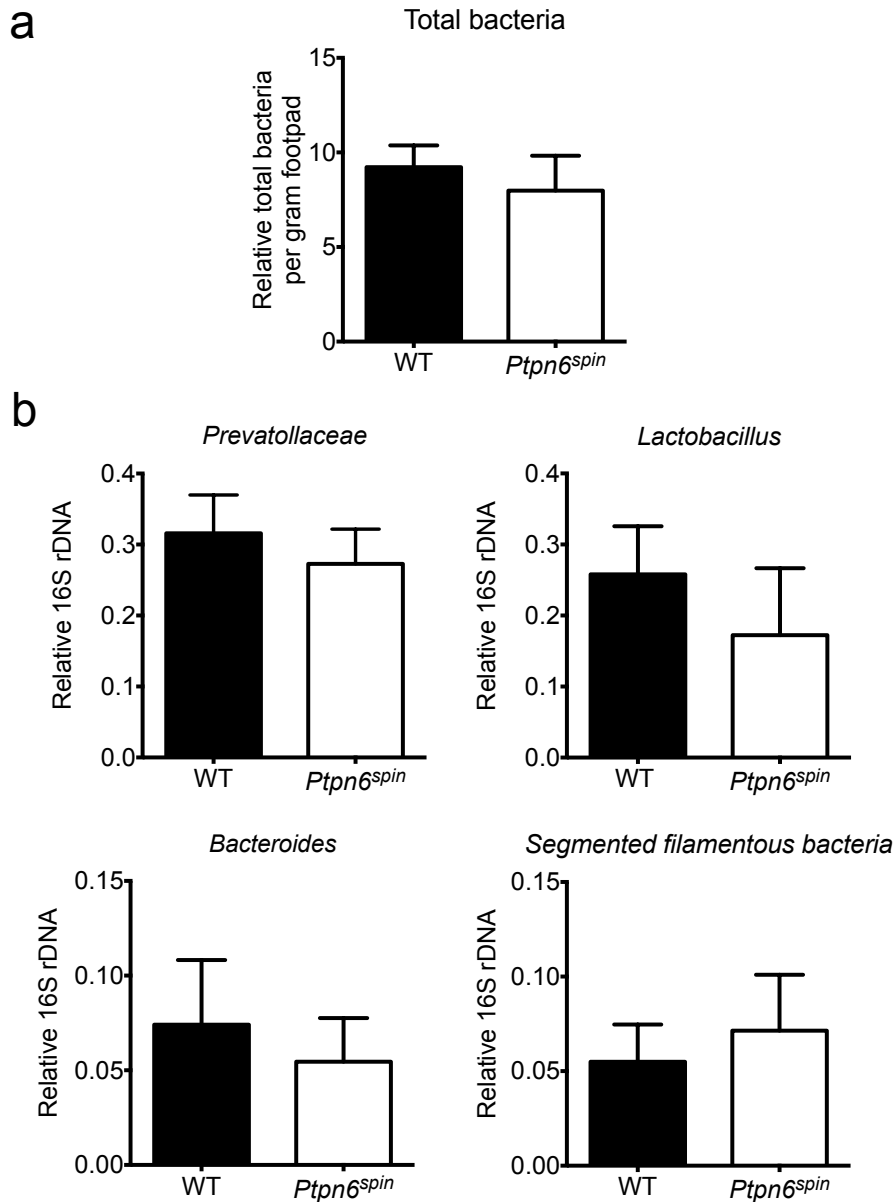

**Supplementary Figure 12. Commensal skin bacteria composition is not altered in *Ptpn6<sup>spin</sup>* mice.** a-b, Levels of total bacteria (a) and specific bacterial species (b) in the skin of WT and diseased *Ptpn6<sup>spin</sup>* mice (12-16 weeks of age). The bar graphs show mean  $\pm$  s.e.m.

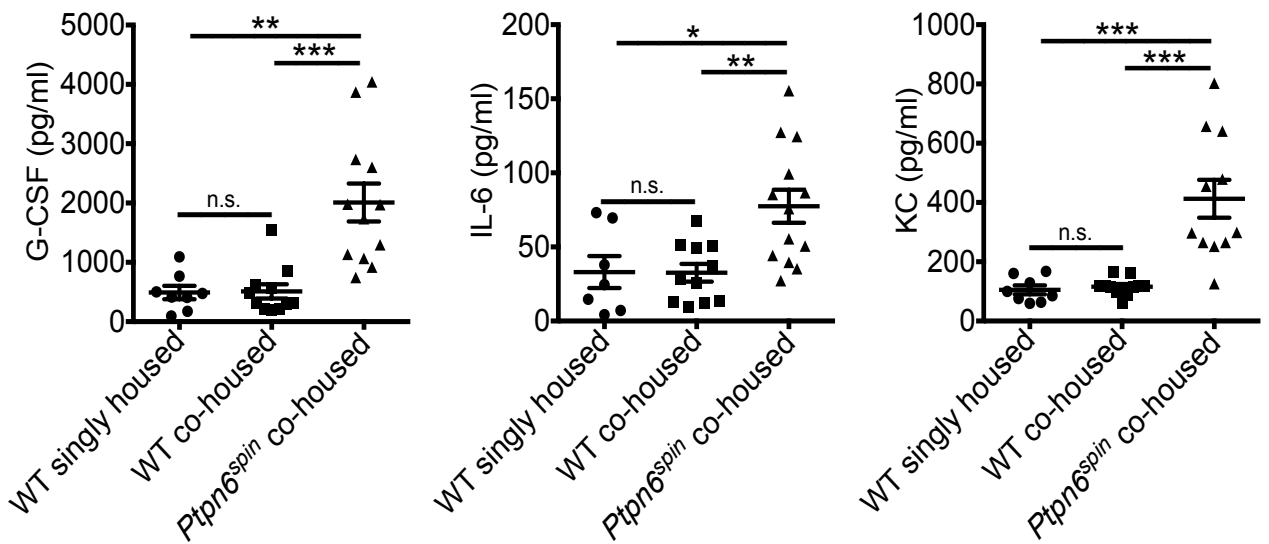

**Supplementary Figure 13. *Ptpn6<sup>spin</sup>*-mediated inflammatory disease is not transferrable to WT mice.** WT mice were singly housed or co-housed at a 1:1 ratio with *Ptpn6<sup>spin</sup>* mice immediately following birth. The levels of serum cytokines and chemokines were determined in mice at 10-16 weeks of age. Each point represents an individual mouse, and the line represents the mean  $\pm$  s.e.m. \* $P < 0.05$ , \*\* $P < 0.01$ , \*\*\* $P < 0.001$ . n.s., not statistically significant. Data are representative of two independent experiments.

a

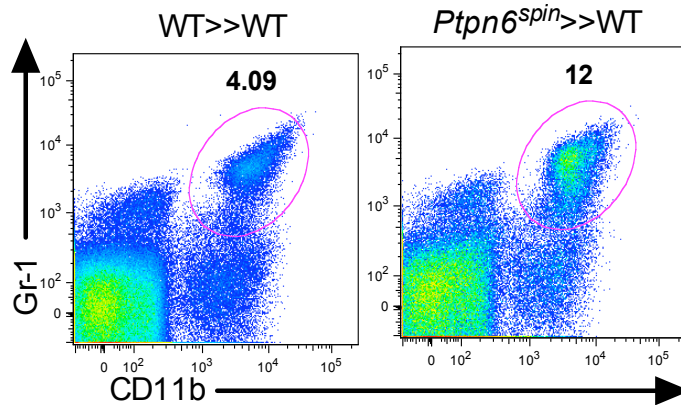

b

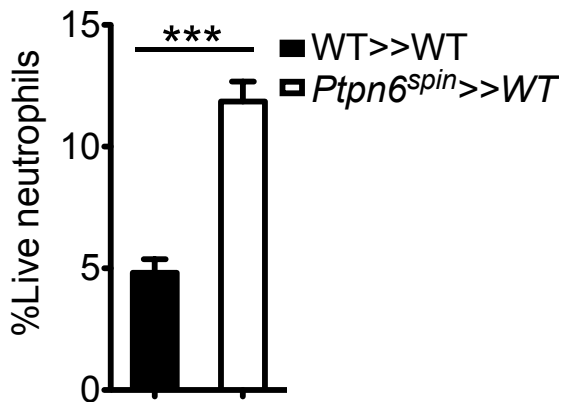

c

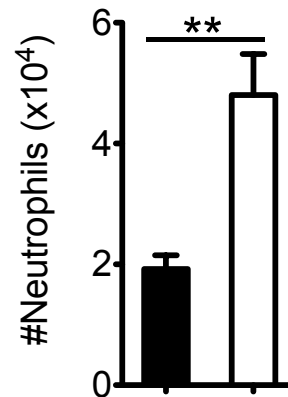

**Supplementary Figure 14. *Ptpn6*<sup>spin</sup> mutation in the haematopoietic compartment causes neutrophilia.** a-c, Bone marrow chimera mice (donor>>recipient) were generated and the levels of circulating neutrophils in the blood was determined. Representative FACS plots (a) and combined data ( $n = 3-4$  mice per chimeric group) (b) depicting the frequencies of circulating cells in the blood that are CD11b<sup>+</sup> Gr-1<sup>+</sup> neutrophils. c, Enumeration of circulating neutrophils in equal volumes of blood.

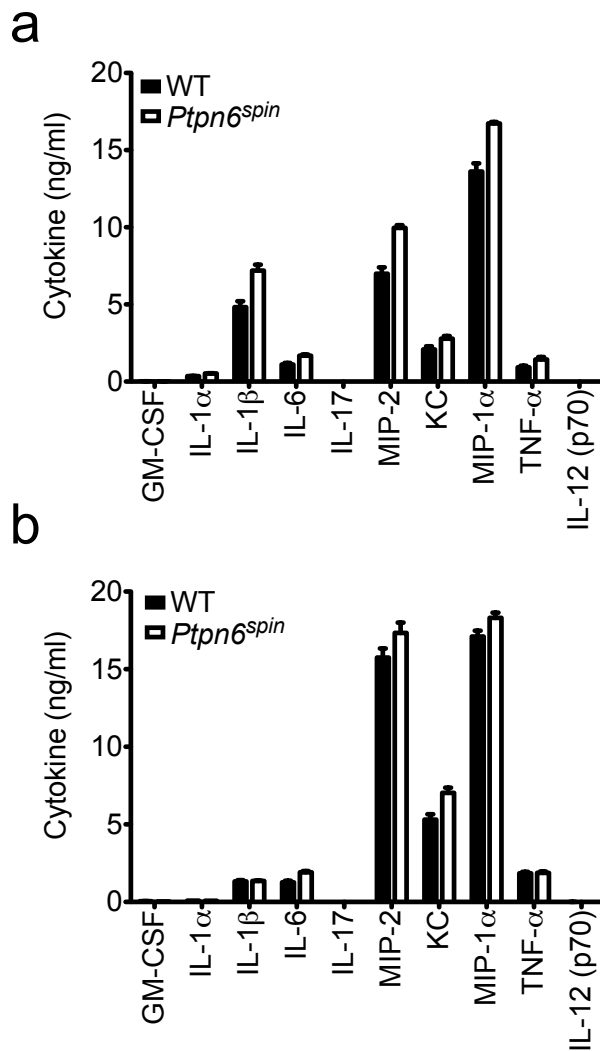

**Supplementary Figure 15. Macrophage-mediated production of proinflammatory cytokines is not affected by PTPN6 mutation.** a-b, Bone marrow derived macrophages (BMDMs) were stimulated with either LPS followed by ATP (a) or *Salmonella typhimurium* (5 MOI) (b) for 4 hr and supernatants were collected to evaluate cytokine secretion by ELISA. The bar graphs show mean  $\pm$  s.e.m. of triplicate wells. Data are representative of four independent experiments.

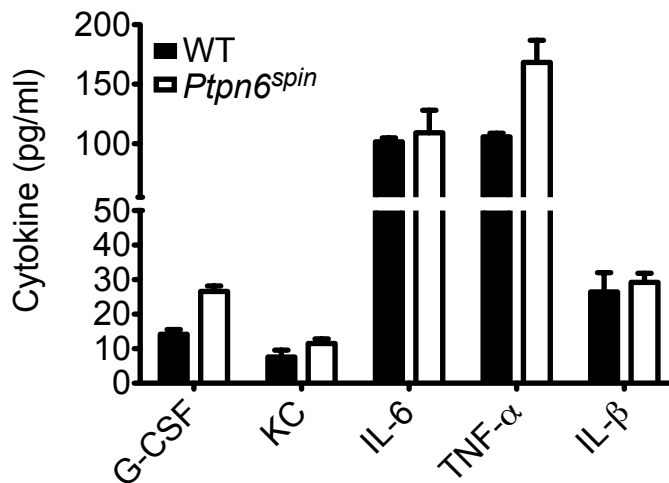

**Supplementary Figure 16. PTPN6 mutation in neutrophils results in slightly higher levels of proinflammatory cytokine secretion.** Purified WT and *Ptpn6<sup>spin</sup>* neutrophils were isolated via flow cytometry sorting. Neutrophils were stimulated with LPS for 48 hrs and cytokine secretion was measured by ELISA. The bar graphs show mean  $\pm$  s.e.m. of triplicate wells. Data are representative of three independent experiments.



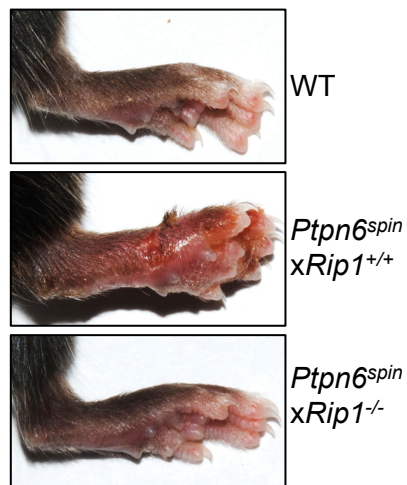

**Supplementary Figure 17. Genetic ablation of RIP1 limits *Ptpn6<sup>spin</sup>*-mediated skin disease.** Representative footpad images of WT (*Ptpn6<sup>WT</sup>xRip1<sup>+/+</sup>* >> WT), *Ptpn6<sup>spin</sup>xRip1<sup>+/+</sup>* (*Ptpn6<sup>spin</sup>xRip1<sup>+/+</sup>* >> WT), and *Ptpn6<sup>spin</sup>xRip1<sup>-/-</sup>* (*Ptpn6<sup>spin</sup>xRip1<sup>-/-</sup>* >> WT) fetal liver transplant mice (donor>>recipient).

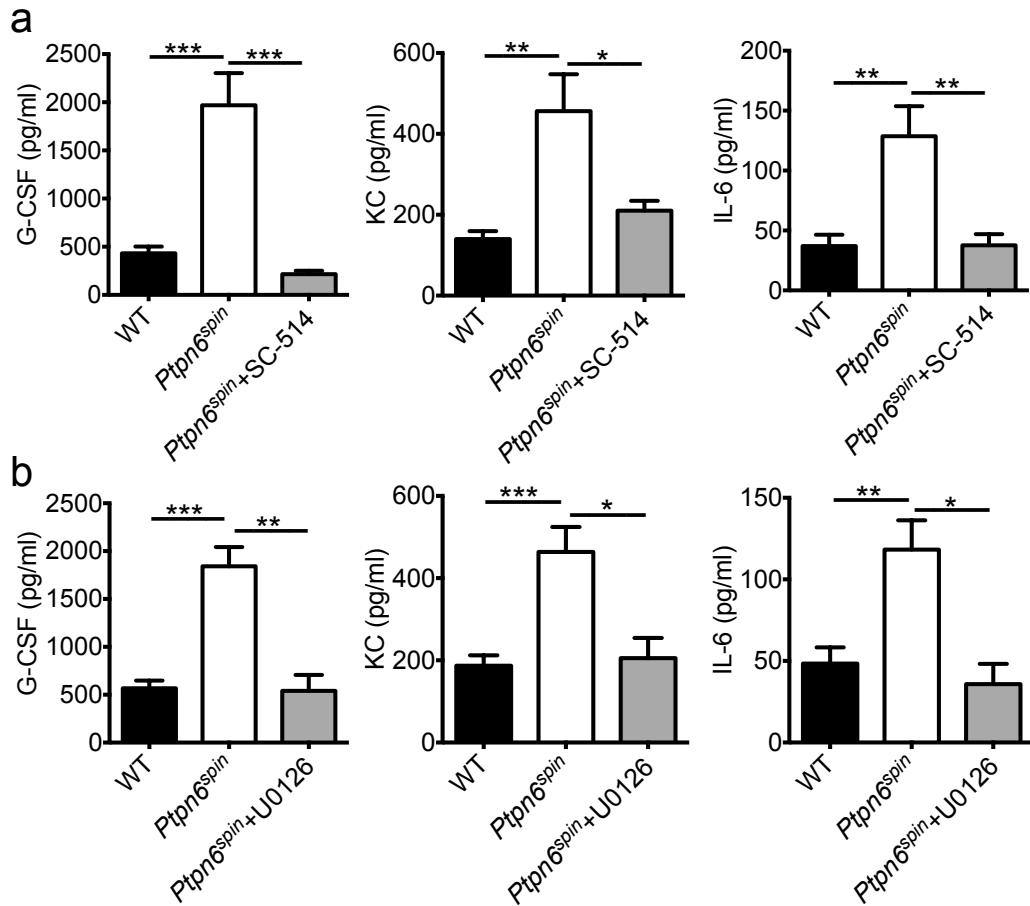

**Supplementary Figure 18. Inhibition of NF- $\kappa$ B and ERK signalling rescues aberrant cytokine production in *Ptpn6<sup>spin</sup>* mice.** WT mice were pretreated with vehicle control ( $n = 11-26$ ) and *Ptpn6<sup>spin</sup>* mice were pretreated with vehicle control ( $n = 14-26$ ), 150  $\mu$ g of SC-514 ( $n = 10$ ) (a) or 75  $\mu$ g of U0126 ( $n = 7$ ) (b) for 1 hour before microabrasion injury induction. Serum levels of granulopoiesis-inducing factors 5 hrs post wound induction. The bar graphs show mean  $\pm$  s.e.m. \* $P < 0.05$ , \*\* $P < 0.01$ , \*\*\* $P < 0.001$ .

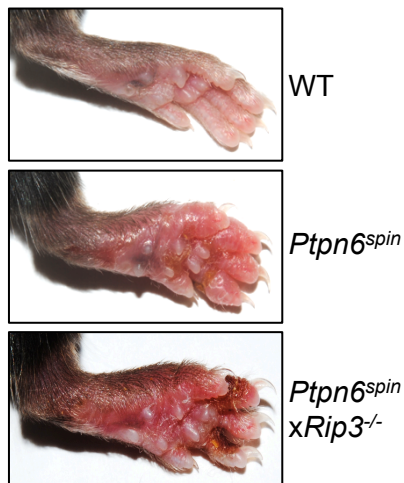

**Supplementary Figure 19. RIP1-mediated regulation of inflammation in *Ptpn6<sup>spin</sup>* mice is not through its regulation of RIP3-induced necroptosis.** Microabrasion injuries were induced on the plantar surfaces of the footpads of WT, *Ptpn6<sup>spin</sup>*, and *Ptpn6<sup>spin</sup>xRip3<sup>-/-</sup>* mice. Representative footpad images of mice at 4 weeks post wound induction are depicted.
